# Supplementary material
Source: PubMed Central journal article supplement (PMC5929214)
Supplement: tpmd170685.SD1.pdf [file tpmd170685.SD1.pdf]

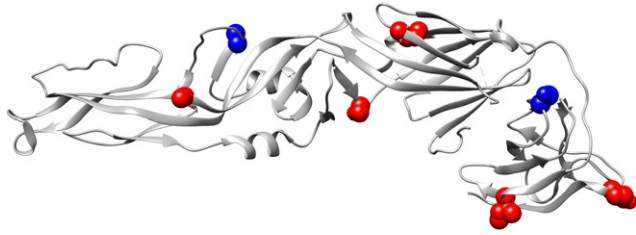

SUPPLEMENTAL FIGURE 1. Zika virus (ZIKV) envelope (E) protein structure (PDB accession no. 5JHM) with relevant amino acid (AA) positions indicated in structural domain I (residue 169), domain I-II hinge region (residue 285), domain II (residues 120 and 227), and domain III (residues 317, 368, and 393). The red AA positions have substitutions that distinguish the Asian lineage strains—CPC-0740, SV0127-14, and PRVABC59—from the African lineage strain—41525-DAK—and might affect virulence in mice. The blue AA positions contain substitutions that are unique to the strain SV0127-14 and might contribute to its attenuated phenotype in mice. Residues 437, 438, and 495 have substitutions that distinguish African and Asian lineage ZIKV strains but are located in the stem-anchor portion of the E protein and are not pictured here. Strain SV0127-14 shares a valine at position 437 with African lineage strains. More contemporary, Asian lineage strains also share V473M and T487M substitutions in the stem-anchor region.

SUPPLEMENTAL TABLE 1  
Zika virus isolate histories and reference sequences

| Isolate        | Lineage | Source                 | Location                 | Year of collection | Accession number |
|----------------|---------|------------------------|--------------------------|--------------------|------------------|
| SV0127-14      | Asian   | <i>Homo sapiens</i>    | Thailand                 | 2014               | KU681081         |
| CPC-0740       | Asian   | <i>H. sapiens</i>      | Philippines              | 2012               | KU681082         |
| FSS13025       | Asian   | <i>H. sapiens</i>      | Cambodia                 | 2010               | KU955593         |
| H/PF/2013      | Asian   | <i>H. sapiens</i>      | French Polynesia         | 2013               | KJ776791         |
| Micronesia     | Asian   | <i>H. sapiens</i>      | Micronesia               | 2007               | EU545988         |
| Z1106033       | Asian   | <i>H. sapiens</i>      | Suriname                 | 2015               | KU312312         |
| PRVABC59       | Asian   | <i>H. sapiens</i>      | Puerto Rico              | 2015               | KU501215         |
| P6-740         | Asian   | <i>Aedes aegypti</i>   | Malaysia                 | 1966               | KX377336         |
| 103344         | Asian   | <i>H. sapiens</i>      | Guatemala                | 2015               | KU501216         |
| MEX-InDRE-Lm   | Asian   | <i>H. sapiens</i>      | Mexico                   | 2016               | KU922923         |
| Haiti-0097     | Asian   | <i>H. sapiens</i>      | Haiti                    | 2014               | KY415991         |
| Brazil-ZKV2015 | Asian   | <i>H. sapiens</i>      | Brazil                   | 2015               | KU497555         |
| MR 766         | Africa  | <i>Macaca mulatta</i>  | Uganda                   | 1947               | KU955594         |
| ArD 41525      | Africa  | <i>Aedes africanus</i> | Senegal                  | 1984               | KU955591         |
| ArD 41519      | Africa  | <i>A. africanus</i>    | Senegal                  | 1984               | HQ234501         |
| ArB13565       | Africa  | <i>A. africanus</i>    | Central African Republic | 1976               | KF268948         |
| IbH 30656      | Africa  | <i>H. sapiens</i>      | Nigeria                  | 1968               | HQ234500         |

SUPPLEMENTAL TABLE 2

Genetic analysis of capsid (C), prM, and envelope (E) proteins of African (ArD 41525) and Asian (CPC-0740, SV0127-14, and PRVABC59) isolates

| Polyprotein aa number | Protein | Protein aa number | Amino acid substitutions |                  |                   |                           |   |
|-----------------------|---------|-------------------|--------------------------|------------------|-------------------|---------------------------|---|
|                       |         |                   | ArD 41525 (African)      | CPC-0740 (Asian) | SV0127-14 (Asian) | PRVABC59 (Asian/American) |   |
| 25                    | C       | 25                | <b>N</b>                 | S                | S                 | S                         |   |
| 27                    |         | 27                | <b>L</b>                 | F                | F                 | F                         |   |
| 80                    |         | 80                | <b>I</b>                 | I                | I                 | T                         |   |
| 101                   |         | 101               | <b>R</b>                 | K                | K                 | K                         |   |
| 106                   |         | 106               | <b>A</b>                 | A                | T                 | A                         |   |
| 110                   |         | 110               | <b>I</b>                 | V                | V                 | V                         |   |
| 123                   |         | prM               | 1                        | <b>A</b>         | V                 | A                         | A |
| 125                   |         |                   | 3                        | <b>I</b>         | V                 | V                         | V |
| 139                   |         |                   | 17                       | <b>S</b>         | S                 | S                         | N |
| 143                   |         |                   | 21                       | <b>K</b>         | E                 | E                         | E |
| 148                   | 26      |                   | <b>A</b>                 | P                | P                 | P                         |   |
| 153                   | 31      |                   | <b>V</b>                 | M                | M                 | M                         |   |
| 157                   | 35      |                   | <b>H</b>                 | Y                | Y                 | Y                         |   |
| 158                   | 36      |                   | <b>V</b>                 | I                | I                 | I                         |   |
| 246                   | 124     |                   | <b>K</b>                 | R                | R                 | R                         |   |
| 260                   | 138     |                   | <b>V</b>                 | A                | A                 | A                         |   |
| 262                   | 140     | <b>V</b>          | A                        | A                | A                 |                           |   |
| 263                   | 141     | <b>A</b>          | V                        | A                | A                 |                           |   |
| 410                   | E       | 120               | <b>T</b>                 | A                | A                 | A                         |   |
| 459                   |         | 169               | <b>V</b>                 | I                | I                 | I                         |   |
| 517                   |         | 227               | <b>A</b>                 | A                | T                 | A                         |   |
| 550                   |         | 260               | <b>S</b>                 | S                | S                 | S                         |   |
| 575                   |         | 285               | <b>F</b>                 | S                | S                 | S                         |   |
| 607                   |         | 317               | <b>V</b>                 | I                | I                 | I                         |   |
| 658                   |         | 368               | <b>S</b>                 | S                | G                 | S                         |   |
| 683                   |         | 393               | <b>D</b>                 | E                | E                 | E                         |   |
| 727                   |         | 437               | <b>V</b>                 | A                | V                 | A                         |   |
| 728                   |         | 438               | <b>F</b>                 | L                | L                 | L                         |   |
| 763                   | 473     | <b>V</b>          | V                        | M                | M                 |                           |   |
| 777                   | 487     | <b>T</b>          | T                        | M                | M                 |                           |   |
| 785                   | 495     | <b>M</b>          | L                        | L                | L                 |                           |   |

Bold denotes mutations unique to ArD 41525 isolate.

SUPPLEMENTAL TABLE 3

Genetic analysis of NS1, NS2A, NS2B, and NS3 proteins of African (ArD 41525) and Asian (CPC-0740, SV0127-14, and PRVABC59) isolates

| Polyprotein aa number | Protein | Protein aa number | Amino acid substitutions |                  |                   |                           |
|-----------------------|---------|-------------------|--------------------------|------------------|-------------------|---------------------------|
|                       |         |                   | ArD 41525 (African)      | CPC-0740 (Asian) | SV0127-14 (Asian) | PRVABC59 (Asian/American) |
| 839                   | NS1     | 45                | A                        | A                | V                 | A                         |
| 846                   |         | 52                | E                        | D                | D                 | D                         |
| 863                   |         | 69                | K                        | R                | R                 | R                         |
| 956                   |         | 162               | I                        | V                | V                 | V                         |
| 982                   |         | 188               | V                        | A                | V                 | V                         |
| 988                   |         | 194               | A                        | V                | V                 | V                         |
| 1007                  |         | 213               | R                        | K                | R                 | K                         |
| 1030                  |         | 236               | V                        | V                | I                 | I                         |
| 1058                  |         | 264               | V                        | M                | M                 | M                         |
| 1180                  |         | NS2A              | 34                       | <b>M</b>         | I                 | I                         |
| 1191                  | 45      |                   | <b>V</b>                 | I                | I                 | I                         |
| 1204                  | 58      |                   | <b>V</b>                 | A                | A                 | A                         |
| 1226                  | 80      |                   | V                        | I                | V                 | I                         |
| 1259                  | 113     |                   | L                        | L                | L                 | L                         |
| 1270                  | 124     |                   | <b>E</b>                 | D                | D                 | D                         |
| 1275                  | 129     |                   | <b>V</b>                 | I                | I                 | I                         |
| 1289                  | 143     |                   | <b>A</b>                 | V                | V                 | V                         |
| 1297                  | 151     |                   | <b>A</b>                 | T                | T                 | T                         |
| 1354                  | 208     |                   | <b>I</b>                 | L                | L                 | L                         |
| 1439                  | NS2B    | 67                | V                        | I                | V                 | V                         |
| 1461                  |         | 89                | <b>E</b>                 | D                | D                 | D                         |
| 1477                  |         | 105               | <b>A</b>                 | T                | T                 | T                         |
| 1558                  | NS3     | 56                | <b>A</b>                 | S                | S                 | S                         |
| 1594                  |         | 92                | <b>L</b>                 | H                | H                 | H                         |
| 1617                  |         | 115               | I                        | T                | I                 | I                         |
| 1671                  |         | 169               | <b>K</b>                 | R                | R                 | R                         |
| 1676                  |         | 174               | <b>A</b>                 | T                | T                 | T                         |
| 1687                  |         | 185               | <b>R</b>                 | K                | K                 | K                         |
| 1717                  |         | 215               | <b>K</b>                 | T                | T                 | T                         |
| 1849                  |         | 347               | <b>S</b>                 | T                | S                 | S                         |
| 1862                  |         | 360               | <b>I</b>                 | V                | V                 | V                         |
| 1902                  |         | 400               | <b>N</b>                 | N                | H                 | H                         |
| 1909                  | 407     | <b>I</b>          | V                        | V                | V                 |                           |
| 1962                  | 460     | <b>V</b>          | I                        | I                | I                 |                           |
| 1974                  | 472     | <b>M</b>          | L                        | L                | L                 |                           |
| 2068                  | 566     | <b>T</b>          | M                        | M                | T                 |                           |
| 2085                  | 583     | <b>K</b>          | R                        | R                | R                 |                           |
| 2086                  | 584     | <b>Y</b>          | Y                        | H                | H                 |                           |

Bold denotes mutations unique to ArD 41525 isolate.

SUPPLEMENTAL TABLE 4

Genetic analysis of NS4A, NS4B, and NS5 proteins of African (ArD 41525) and Asian (CPC-0740, SV0127-14, and PRVABC59) isolates

| Polyprotein aa number | Protein | Protein aa number | Amino acid substitutions |                  |                   |                           |
|-----------------------|---------|-------------------|--------------------------|------------------|-------------------|---------------------------|
|                       |         |                   | ArD 41525 (African)      | CPC-0740 (Asian) | SV0127-14 (Asian) | PRVABC59 (Asian/American) |
| 2123                  | NS4A    | 4                 | <b>L</b>                 | F                | F                 | F                         |
| 2126                  |         | 7                 | <b>M</b>                 | I                | M                 | M                         |
| 2127                  |         | 8                 | <b>D</b>                 | E                | E                 | E                         |
| 2197                  | NS4B    | 78                | <b>I</b>                 | M                | I                 | I                         |
| 2282                  |         | 13                | <b>I</b>                 | L                | L                 | L                         |
| 2283                  |         | 14                | <b>A</b>                 | S                | S                 | S                         |
| 2289                  |         | 20                | <b>K</b>                 | R                | R                 | R                         |
| 2293                  |         | 24                | <b>T</b>                 | A                | A                 | A                         |
| 2295                  |         | 26                | <b>M</b>                 | T                | I                 | I                         |
| 2318                  |         | 49                | <b>L</b>                 | F                | F                 | F                         |
| 2367                  |         | 98                | <b>M</b>                 | M                | I                 | I                         |
| 2453                  |         | 184               | <b>V</b>                 | I                | I                 | I                         |
| 2455                  |         | 186               | <b>L</b>                 | S                | S                 | S                         |
| 2594                  | NS5     | 74                | <b>H</b>                 | Y                | Y                 | Y                         |
| 2598                  |         | 78                | <b>V</b>                 | I                | I                 | I                         |
| 2621                  |         | 101               | <b>R</b>                 | K                | K                 | K                         |
| 2634                  |         | 114               | <b>M</b>                 | M                | M                 | <b>V</b>                  |
| 2679                  |         | 159               | <b>T</b>                 | A                | A                 | A                         |
| 2701                  |         | 181               | <b>I</b>                 | I                | V                 | I                         |
| 2715                  |         | 195               | <b>M</b>                 | L                | L                 | L                         |
| 2722                  |         | 202               | <b>H</b>                 | Y                | Y                 | Y                         |
| 2749                  |         | 229               | <b>I</b>                 | T                | T                 | T                         |
| 2765                  |         | 245               | <b>E</b>                 | D                | D                 | D                         |
| 2787                  |         | 267               | <b>A</b>                 | V                | V                 | V                         |
| 2800                  |         | 280               | <b>R</b>                 | N                | N                 | N                         |
| 2807                  |         | 287               | <b>N</b>                 | S                | S                 | S                         |
| 2831                  |         | 311               | <b>E</b>                 | E                | E                 | E                         |
| 2842                  |         | 322               | <b>V</b>                 | I                | I                 | I                         |
| 2896                  |         | 376               | <b>N</b>                 | S                | S                 | S                         |
| 2909                  |         | 389               | <b>R</b>                 | H                | H                 | H                         |
| 2969                  |         | 449               | <b>H</b>                 | Q                | Q                 | Q                         |
| 3039                  |         | 519               | <b>I</b>                 | V                | V                 | V                         |
| 3044                  |         | 524               | <b>N</b>                 | S                | S                 | S                         |
| 3046                  |         | 526               | <b>A</b>                 | I                | I                 | I                         |
| 3050                  |         | 530               | <b>K</b>                 | R                | R                 | R                         |
| 3065                  |         | 545               | <b>K</b>                 | R                | R                 | R                         |
| 3080                  |         | 560               | <b>E</b>                 | K                | K                 | K                         |
| 3089                  |         | 569               | <b>V</b>                 | I                | I                 | I                         |
| 3107                  |         | 587               | <b>G</b>                 | K                | K                 | K                         |
| 3154                  |         | 634               | <b>H</b>                 | Q                | Q                 | Q                         |
| 3161                  |         | 641               | <b>K</b>                 | R                | R                 | R                         |
| 3162                  | 642     | <b>P</b>          | P                        | S                | S                 |                           |
| 3167                  | 647     | <b>R</b>          | N                        | N                | N                 |                           |
| 3223                  | 703     | <b>S</b>          | D                        | D                | D                 |                           |
| 3304                  | 784     | <b>A</b>          | S                        | S                | S                 |                           |
| 3307                  | 787     | <b>I</b>          | V                        | V                | V                 |                           |
| 3333                  | 813     | <b>M</b>          | V                        | V                | V                 |                           |
| 3387                  | 867     | <b>D</b>          | N                        | N                | N                 |                           |
| 3392                  | 872     | <b>V</b>          | M                        | V                | V                 |                           |
| 3402                  | 882     | <b>F</b>          | Y                        | Y                | Y                 |                           |

Bold denotes mutations unique to ArD 41525 isolate.
